# Supplementary material for: Ultralight, super-compression, and hydrophobic nanofibrous aerogels from cellulose acetate/polyethylene oxide nanofibers for efficient and recyclable oil absorption
Source: Royal Society of Chemistry journal article supplement (doi:10.1039/d3nj00521f), 2023-01-01
Supplement: d3nj00521f1.pdf [file d3nj00521f1.pdf]

## Supporting Information

### Ultralight, Super-compression, and Hydrophobic Nanofibrous Aerogels from Thermally-crosslinked Cellulose Acetate/Polyethylene Oxide Nanofibers for Efficient and Recyclable oil absorption

Lingyun Wu<sup>a</sup>, Liang Gao<sup>b</sup>, Jiaming Li<sup>a</sup>, Tianyu Wu<sup>a</sup>, Dongli Chen<sup>a</sup>, Manxi Zhou<sup>\*a</sup>, and Gang Sui<sup>\*a</sup>

<sup>a</sup>State Key Laboratory of Organic-Inorganic Composites, College of Materials Science and Engineering, Beijing University of Chemical Technology, Beijing 100029, China.

<sup>b</sup>Department of Resin & Prepreg, AVIC Manufacturing Technology Institute Composite Technology Center, Beijing 101300, China.

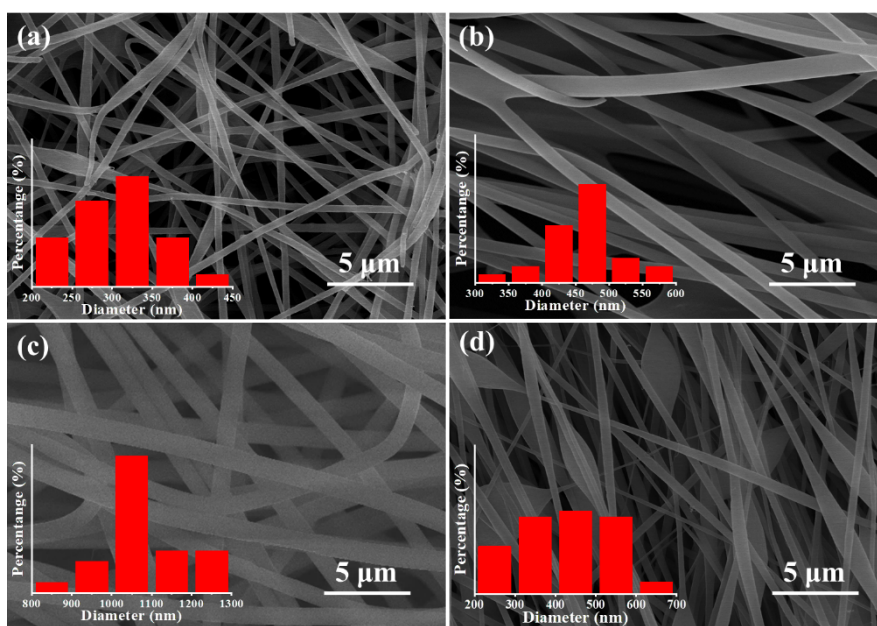

**Figure S1.** SEM images of electrospun nanofibers with different CA/PEO ratios and the corresponding statistical graphics of diameter distribution: (a) 1:1, (b) 2:1, (c) 3:1, and (d) 1:0.

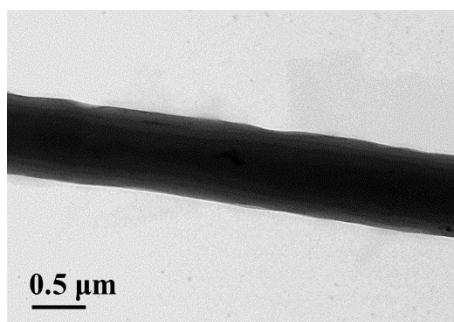

**Figure S2.** TEM image of CA/PEO nanofiber.

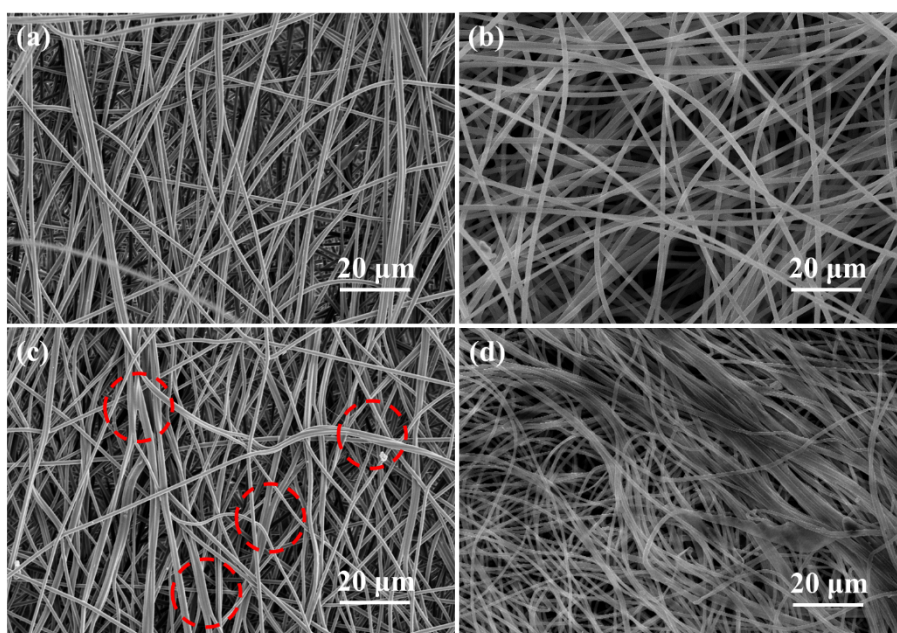

**Figure S3.** SEM images of thermally-crosslinked CA/PEO nanofibers at different temperatures: (a) room temperature, (b) 50 °C, (c) 70 °C, and (d) 100 °C. The red circle marked the crosslinking points between nanofibers.

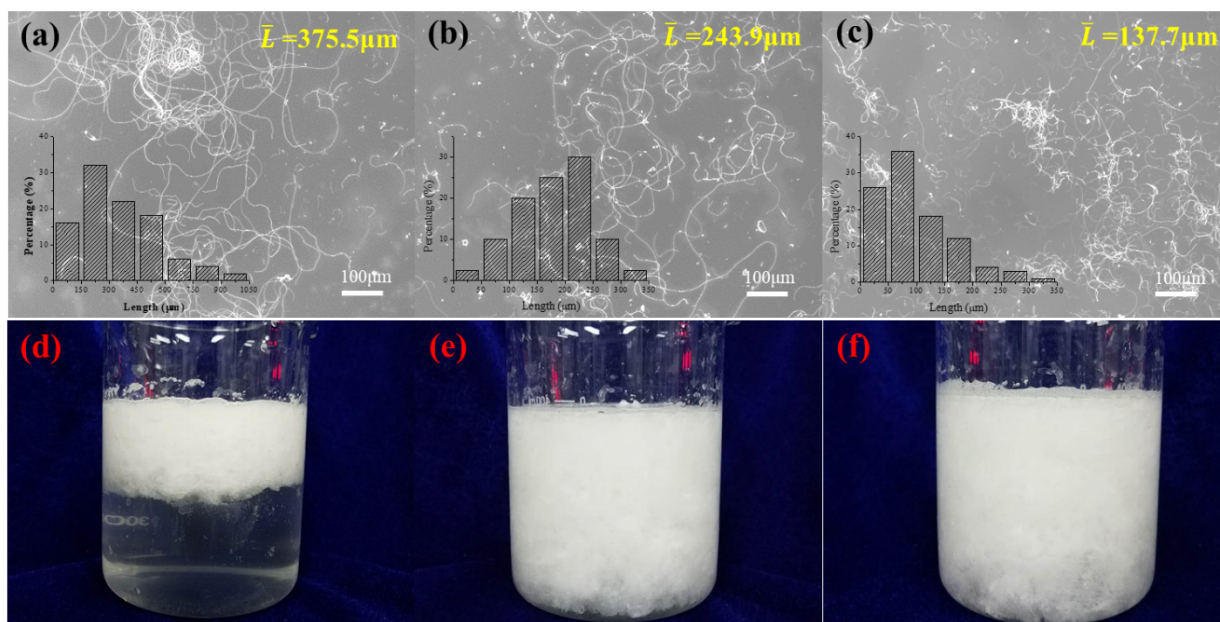

**Figure S4.** SEM images of chopped fibers with different dispersion lengths and the corresponding statistical data of length distribution: (a, d) 20 min, (b, e) 30 min, and (c, f) 40 min.

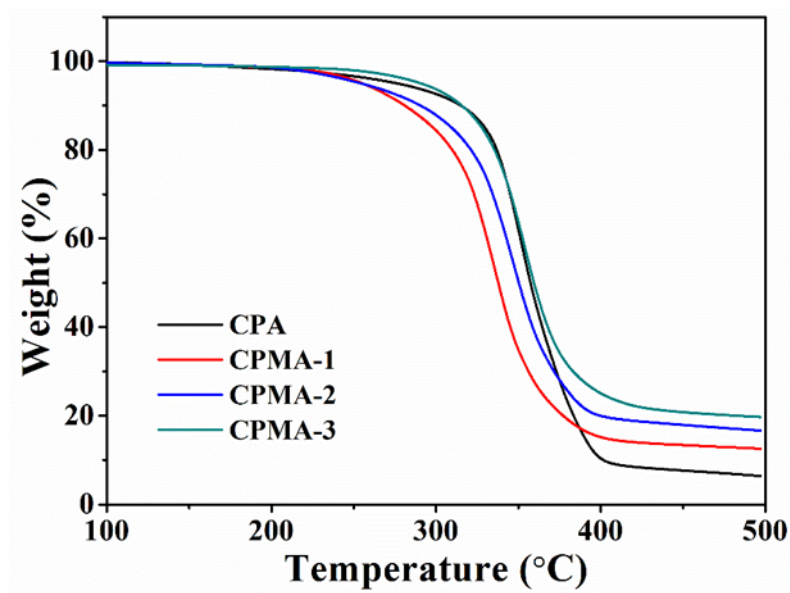

**Figure S5.** TGA curves of CPA and CPMA-1, 2, 3

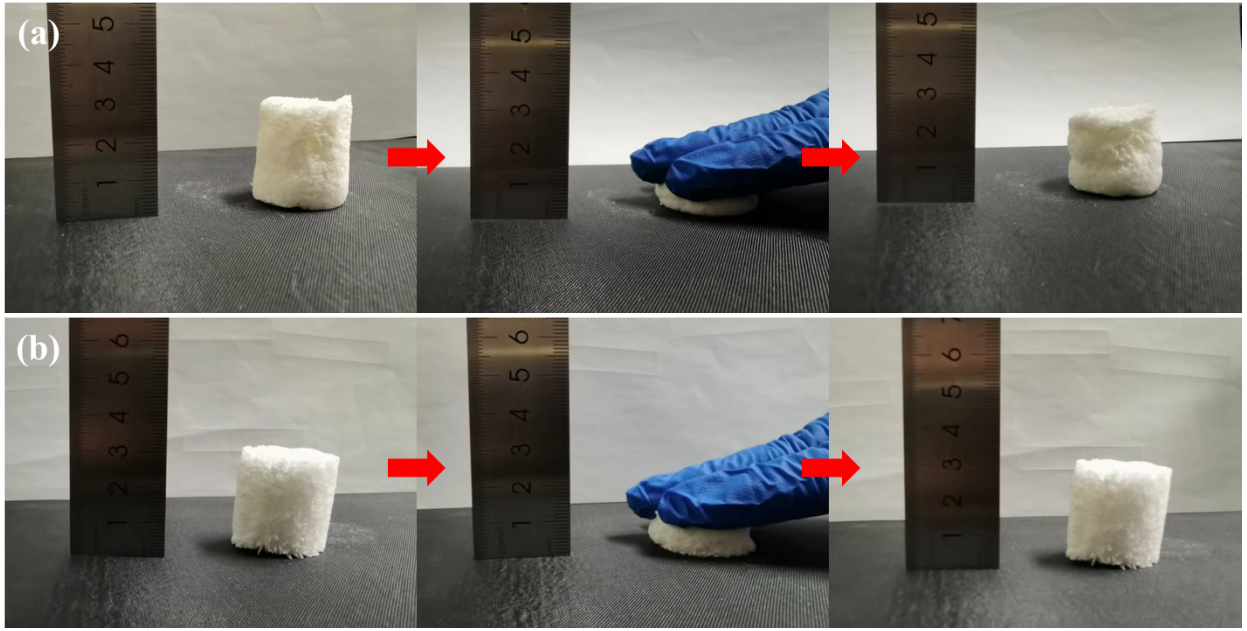

**Figure S6.** Photos of the compression-recovering process of (a) CPA and (b) CPMA.

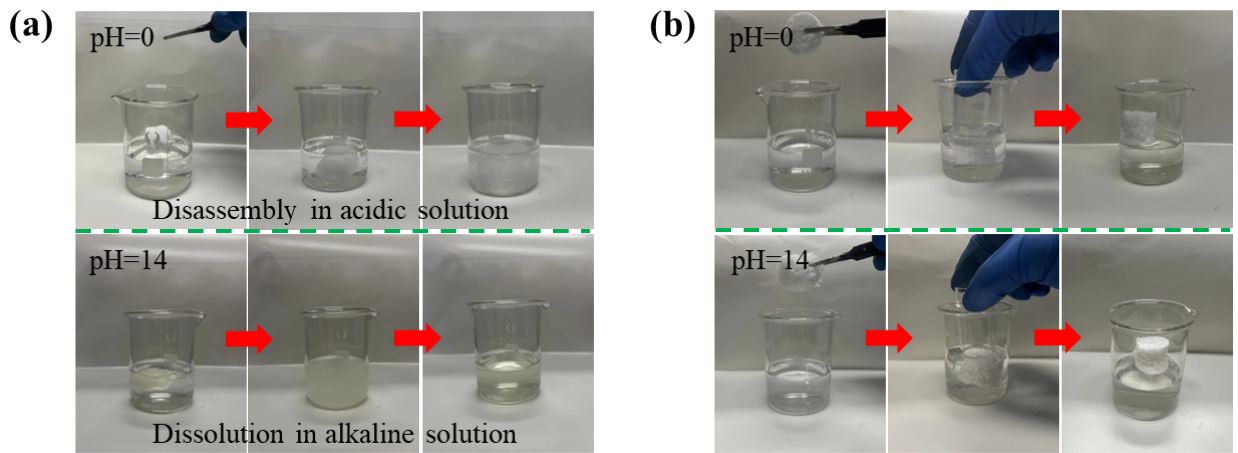

**Figure S7.** Photos of acid and alkali resistance test. (a) CPA, (b) CPMA-3. The CPMA-3 aerogel samples will always float on the liquid surface and external force was needed to keep it immersed.
